# Supplementary material
Source: PubMed Central journal article supplement (PMC3198344)
Supplement: 1109748108_pnas.1109748108_SI.pdf [file 1109748108_pnas.1109748108_SI.pdf]

# Supporting Information

Murakami and Bass 10.1073/pnas.1109748108

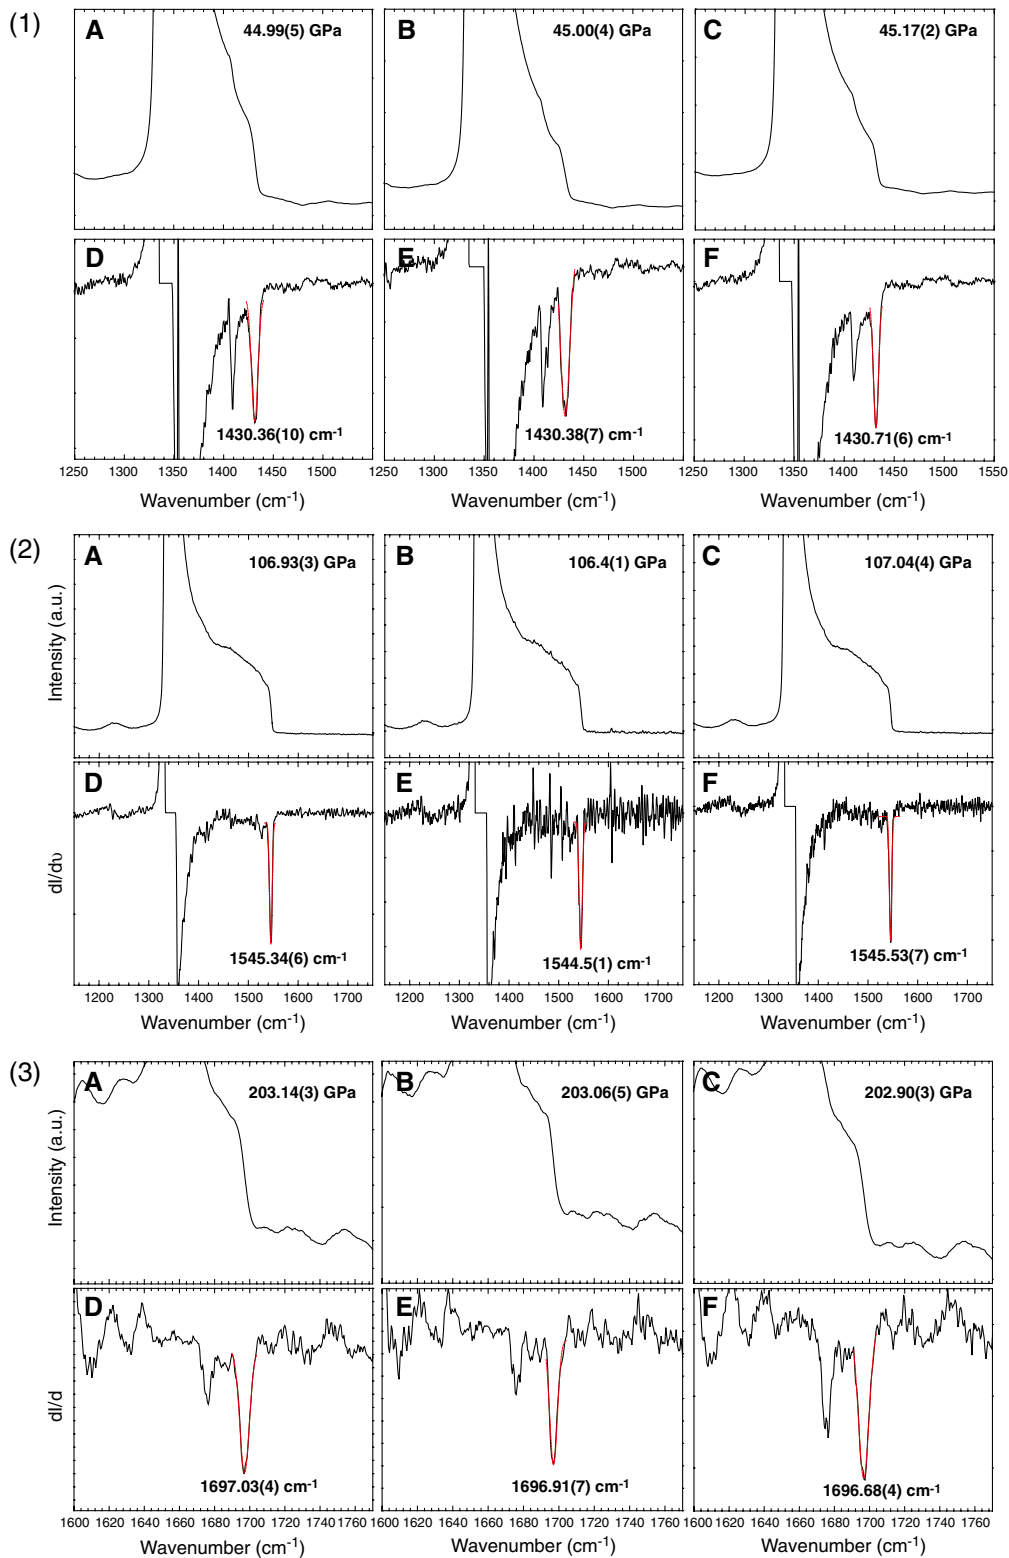

**Fig. S1.** Representative Raman spectra of different pressure conditions [(1), (2), (3)] from different analyzed positions within approximately 20  $\mu\text{m}$  in diameter (*A, B, C*) around the center of the sample where the probe laser for Brillouin scattering measurements was irradiated, and their differential spectra  $dI/dv$  (*D, E, F*). The high-frequency edge of the Raman band was defined as a minimum of the  $dI/dv$ . The red lines represent the fitting curves using Gaussian function for determination of the minimum position. Number in parenthesis represents uncertainties in the last digit for both wavenumber and pressure. Uncertainties for the wavenumber of the minimum position of  $dI/dv$  in each spectrum is derived from the errors of the curve fitting. The total uncertainties of pressure was finally estimated from the standard deviation ( $-1\sigma$ ) of each determined pressure value in each point.

**Table S1. Peak position of the Raman differential spectrum ( $dI/dv$ ) for pressure determination (*R* peak), pressure (*P*) and shear velocity ( $V_s$ ) of  $\text{MgSiO}_3$  glass, and full width at half maximum (FWHM) of Raman differential peak (FWHM-1) and Brillouin peak from TA mode of the sample (FWHM-2)**

| <i>R</i> peak (cm <sup>-1</sup> ) | <i>R</i> peak error (cm <sup>-1</sup> ) | FWHM-1 (cm <sup>-1</sup> ) | FWHM-1 error (cm <sup>-1</sup> ) | <i>P</i> (GPa) | <i>P</i> error (GPa) | $V_s$ (km/s) | $V_s$ error (km/s) | FWHM-2 (GHz) | FWHM-2 error (GHz) |
|-----------------------------------|-----------------------------------------|----------------------------|----------------------------------|----------------|----------------------|--------------|--------------------|--------------|--------------------|
| 1,361.6                           | 0.2                                     | 3.2                        | 0.4                              | 12.5           | 0.1                  | 4.08         | 0.03               | 0.32         | 0.02               |
| 1,375.1                           | 0.0                                     | 8.4                        | 0.6                              | 18.6           | 0.0                  | 4.42         | 0.05               | 0.26         | 0.02               |
| 1,385.5                           | 0.0                                     | 4.5                        | 0.1                              | 23.4           | 0.0                  | 4.65         | 0.03               | 0.32         | 0.02               |
| 1,394.3                           | 0.2                                     | 4.6                        | 0.2                              | 27.5           | 0.1                  | 4.80         | 0.02               | 0.42         | 0.01               |
| 1,401.8                           | 0.6                                     | 4.7                        | 0.3                              | 31.1           | 0.3                  | 4.93         | 0.03               | 0.70         | 0.07               |
| 1,405.8                           | 0.2                                     | 4.7                        | 0.3                              | 33.0           | 0.1                  | 4.90         | 0.04               | 0.40         | 0.01               |
| 1,413.3                           | 0.4                                     | 4.6                        | 0.6                              | 36.6           | 0.2                  | 5.02         | 0.02               | 0.38         | 0.01               |
| 1,413.7                           | 0.0                                     | 4.8                        | 0.3                              | 36.8           | 0.0                  | 5.03         | 0.07               | 0.68         | 0.07               |
| 1,421.7                           | 0.4                                     | 5.0                        | 0.2                              | 40.7           | 0.2                  | 5.08         | 0.01               | 0.98         | 0.09               |
| 1,423.9                           | 0.0                                     | 4.4                        | 1.3                              | 41.8           | 0.0                  | 5.15         | 0.02               | 0.38         | 0.01               |
| 1,430.3                           | 0.2                                     | 4.9                        | 0.2                              | 45.0           | 0.1                  | 5.22         | 0.00               | 0.44         | 0.03               |
| 1,432.2                           | 0.2                                     | 5.8                        | 0.4                              | 45.9           | 0.1                  | 5.24         | 0.01               | 0.30         | 0.01               |
| 1,440.4                           | 0.2                                     | 5.3                        | 0.4                              | 50.0           | 0.1                  | 5.31         | 0.05               | 0.70         | 0.02               |
| 1,444.1                           | 0.2                                     | 3.9                        | 0.4                              | 51.9           | 0.1                  | 5.32         | 0.01               | 0.54         | 0.04               |
| 1,450.2                           | 0.8                                     | 6.2                        | 0.7                              | 55.0           | 0.4                  | 5.35         | 0.08               | 0.64         | 0.03               |
| 1,452.3                           | 0.7                                     | 4.0                        | 0.1                              | 56.1           | 0.3                  | 5.41         | 0.03               | 0.46         | 0.02               |
| 1,457.4                           | 0.2                                     | 6.1                        | 0.3                              | 58.7           | 0.1                  | 5.45         | 0.02               | 0.40         | 0.03               |
| 1,464.3                           | 1.0                                     | 5.9                        | 0.4                              | 62.3           | 0.5                  | 5.51         | 0.04               | 0.88         | 0.09               |
| 1,470.6                           | 0.4                                     | 4.5                        | 0.1                              | 65.6           | 0.2                  | 5.52         | 0.03               | 0.44         | 0.01               |
| 1,474.8                           | 0.4                                     | 5.1                        | 0.4                              | 67.8           | 0.2                  | 5.55         | 0.02               | 0.80         | 0.01               |
| 1,483.6                           | 0.6                                     | 6.1                        | 0.7                              | 72.5           | 0.3                  | 5.59         | 0.02               | 0.46         | 0.01               |
| 1,491.6                           | 0.5                                     | 7.0                        | 0.3                              | 76.8           | 0.3                  | 5.67         | 0.04               | 0.34         | 0.01               |
| 1,501.7                           | 0.5                                     | 5.9                        | 0.2                              | 82.3           | 0.2                  | 5.77         | 0.03               | 0.40         | 0.01               |
| 1,510.7                           | 0.6                                     | 7.8                        | 0.4                              | 87.3           | 0.3                  | 5.77         | 0.01               | 0.40         | 0.01               |
| 1,520.6                           | 1.2                                     | 5.5                        | 0.4                              | 92.8           | 0.7                  | 5.88         | 0.05               | 0.54         | 0.03               |
| 1,526.4                           | 0.7                                     | 8.1                        | 0.6                              | 96.1           | 0.4                  | 5.94         | 0.06               | 0.36         | 0.02               |
| 1,528.7                           | 0.2                                     | 4.5                        | 0.2                              | 97.4           | 0.1                  | 5.89         | 0.00               | 0.54         | 0.04               |
| 1,531.0                           | 2.6                                     | 6.8                        | 0.4                              | 98.7           | 1.5                  | 5.93         | 0.07               | 1.02         | 0.07               |
| 1,536.1                           | 0.3                                     | 14.1                       | 7.5                              | 101.6          | 0.2                  | 5.96         | 0.05               | 1.02         | 0.02               |
| 1,538.4                           | 0.3                                     | 5.1                        | 0.2                              | 102.9          | 0.2                  | 5.98         | 0.01               | 0.42         | 0.03               |
| 1,539.1                           | 0.5                                     | 5.4                        | 0.7                              | 103.3          | 0.3                  | 6.00         | 0.06               | 0.62         | 0.06               |
| 1,544.8                           | 1.9                                     | 6.0                        | 0.6                              | 106.6          | 1.1                  | 5.99         | 0.03               | 0.56         | 0.05               |
| 1,545.1                           | 0.5                                     | 5.3                        | 0.3                              | 106.8          | 0.3                  | 6.00         | 0.01               | 0.48         | 0.03               |
| 1,559.0                           | 0.3                                     | 6.4                        | 0.8                              | 114.9          | 0.2                  | 6.02         | 0.01               | 0.34         | 0.04               |
| 1,566.6                           | 1.0                                     | 3.5                        | 0.4                              | 119.4          | 0.6                  | 6.08         | 0.05               | 0.44         | 0.05               |
| 1,571.8                           | 0.3                                     | 3.9                        | 0.3                              | 122.5          | 0.2                  | 6.05         | 0.05               | 0.64         | 0.05               |
| 1,573.8                           | 2.4                                     | 12.6                       | 5.0                              | 123.7          | 1.5                  | 6.08         | 0.03               | 0.42         | 0.02               |
| 1,580.1                           | 0.3                                     | 17.5                       | 3.0                              | 127.5          | 0.2                  | 6.09         | 0.02               | 0.56         | 0.01               |
| 1,585.2                           | 0.6                                     | 10.8                       | 0.7                              | 130.6          | 0.4                  | 6.13         | 0.06               | 0.46         | 0.02               |
| 1,587.1                           | 0.4                                     | 14.0                       | 0.5                              | 131.8          | 0.2                  | 6.14         | 0.07               | 0.56         | 0.05               |
| 1,591.1                           | 0.5                                     | 10.6                       | 0.6                              | 134.2          | 0.3                  | 6.18         | 0.04               | 0.64         | 0.05               |
| 1,597.1                           | 0.1                                     | 6.2                        | 0.9                              | 137.9          | 0.1                  | 6.20         | 0.06               | 0.60         | 0.05               |
| 1,601.5                           | 0.3                                     | 3.4                        | 1.3                              | 140.6          | 0.2                  | 6.19         | 0.05               | 0.46         | 0.03               |
| 1,608.8                           | 0.5                                     | 1.4                        | 0.5                              | 145.2          | 0.3                  | 6.28         | 0.04               | 0.46         | 0.02               |
| 1,611.2                           | 0.4                                     | 7.3                        | 1.0                              | 146.7          | 0.2                  | 6.26         | 0.03               | 0.66         | 0.05               |
| 1,613.5                           | 0.3                                     | 10.5                       | 0.3                              | 148.1          | 0.2                  | 6.30         | 0.02               | 0.98         | 0.16               |
| 1,617.6                           | 1.3                                     | 6.7                        | 0.7                              | 150.7          | 0.8                  | 6.31         | 0.04               | 0.44         | 0.02               |
| 1,619.6                           | 0.7                                     | 15.7                       | 1.2                              | 152.0          | 0.4                  | 6.32         | 0.03               | 0.60         | 0.01               |
| 1,625.3                           | 3.0                                     | 10.5                       | 0.9                              | 155.6          | 1.9                  | 6.35         | 0.04               | 0.72         | 0.09               |
| 1,630.0                           | 0.8                                     | 5.2                        | 0.6                              | 158.6          | 0.5                  | 6.40         | 0.01               | 0.74         | 0.13               |
| 1,633.3                           | 1.1                                     | 6.8                        | 0.7                              | 160.7          | 0.7                  | 6.41         | 0.06               | 0.54         | 0.03               |
| 1,644.7                           | 0.5                                     | 6.8                        | 0.4                              | 168.1          | 0.3                  | 6.44         | 0.02               | 0.64         | 0.04               |
| 1,654.8                           | 1.8                                     | 8.8                        | 1.4                              | 174.7          | 1.2                  | 6.50         | 0.03               | 0.78         | 0.08               |
| 1,656.8                           | 1.0                                     | 2.3                        | 0.3                              | 176.0          | 0.7                  | 6.49         | 0.01               | 1.10         | 0.18               |
| 1,666.7                           | 0.6                                     | 8.7                        | 0.7                              | 182.6          | 0.4                  | 6.57         | 0.03               | 0.60         | 0.03               |
| 1,675.2                           | 0.6                                     | 8.1                        | 2.3                              | 188.3          | 0.4                  | 6.62         | 0.01               | 0.52         | 0.02               |
| 1,682.6                           | 0.2                                     | 5.5                        | 0.4                              | 193.3          | 0.1                  | 6.63         | 0.01               | 0.96         | 0.10               |
| 1,690.1                           | 0.6                                     | 4.5                        | 0.5                              | 198.4          | 0.4                  | 6.64         | 0.03               | 0.68         | 0.07               |
| 1,696.8                           | 0.2                                     | 5.4                        | 0.1                              | 203.0          | 0.1                  | 6.66         | 0.04               | 0.46         | 0.03               |
